# Supplementary material for: Identification of Two Novel Anti-Fibrotic Benzopyran Compounds Produced by Engineered Strains Derived from Streptomyces xiamenensis M1-94P that Originated from Deep-Sea Sediments
Source: MDPI journal article supplement (doi:10.3390/md11104035), 2013-10-22
Supplement: s3 [file s3]

marinedrugs-11-04035-s001.mol
  ChemDraw11081308362D

 21 22  0  0  0  0  0  0  0  0999 V2000
   -2.5006    0.2062    0.0000 C   0  0  0  0  0  0  0  0  0  0  0  0
   -2.5006   -0.6188    0.0000 C   0  0  0  0  0  0  0  0  0  0  0  0
   -1.7862   -1.0313    0.0000 C   0  0  0  0  0  0  0  0  0  0  0  0
   -1.0717   -0.6188    0.0000 C   0  0  0  0  0  0  0  0  0  0  0  0
   -1.0717    0.2062    0.0000 C   0  0  0  0  0  0  0  0  0  0  0  0
   -1.7862    0.6187    0.0000 C   0  0  0  0  0  0  0  0  0  0  0  0
   -0.3572   -1.0313    0.0000 O   0  0  0  0  0  0  0  0  0  0  0  0
    0.3572   -0.6188    0.0000 C   0  0  0  0  0  0  0  0  0  0  0  0
    0.3572    0.2062    0.0000 C   0  0  0  0  0  0  0  0  0  0  0  0
   -0.3572    0.6187    0.0000 C   0  0  0  0  0  0  0  0  0  0  0  0
   -3.2151    0.6187    0.0000 C   0  0  0  0  0  0  0  0  0  0  0  0
   -3.2151    1.4438    0.0000 N   0  0  0  0  0  0  0  0  0  0  0  0
   -3.9296    0.2062    0.0000 O   0  0  0  0  0  0  0  0  0  0  0  0
    1.0717    0.6187    0.0000 O   0  0  0  0  0  0  0  0  0  0  0  0
    1.0717   -1.0313    0.0000 C   0  0  0  0  0  0  0  0  0  0  0  0
    0.3572   -1.4438    0.0000 C   0  0  0  0  0  0  0  0  0  0  0  0
    1.7862   -0.6188    0.0000 C   0  0  0  0  0  0  0  0  0  0  0  0
    2.5006   -1.0313    0.0000 C   0  0  0  0  0  0  0  0  0  0  0  0
    3.2151   -0.6188    0.0000 C   0  0  0  0  0  0  0  0  0  0  0  0
    3.2151    0.2062    0.0000 C   0  0  0  0  0  0  0  0  0  0  0  0
    3.9296   -1.0313    0.0000 C   0  0  0  0  0  0  0  0  0  0  0  0
  1  2  2  0      
  2  3  1  0      
  3  4  2  0      
  4  5  1  0      
  5  6  2  0      
  6  1  1  0      
  4  7  1  0      
  7  8  1  0      
  8  9  1  0      
  9 10  1  0      
 10  5  1  0      
  1 11  1  0      
 11 12  1  0      
 11 13  2  0      
  9 14  1  6      
  8 15  1  6      
  8 16  1  1      
 15 17  1  0      
 17 18  1  0      
 18 19  2  0      
 19 20  1  0      
 19 21  1  0      
M  END
