# Supplementary material for: Identification of Two Novel Anti-Fibrotic Benzopyran Compounds Produced by Engineered Strains Derived from Streptomyces xiamenensis M1-94P that Originated from Deep-Sea Sediments
Source: MDPI journal article supplement (doi:10.3390/md11104035), 2013-10-22
Supplement: s4 [file s4]

marinedrugs-11-04035-s002.mol
  corina  11211302133D 1   1.00000     0.00000 
CORINA 3.49 0023  12.04.2013
 29 30  0  0  0  0  0  0  0  0999 V2000
   -0.0169    1.3930    0.0097 C   0  0  0  0  0  0  0  0  0  0  0  0
    0.0021   -0.0041    0.0020 C   0  0  0  0  0  0  0  0  0  0  0  0
    1.2046   -0.6715   -0.0152 C   0  0  0  0  0  0  0  0  0  0  0  0
    2.4050    0.0372   -0.0248 C   0  0  0  0  0  0  0  0  0  0  0  0
    2.3897    1.4243   -0.0129 C   0  0  0  0  0  0  0  0  0  0  0  0
    1.1865    2.1006    0.0020 C   0  0  0  0  0  0  0  0  0  0  0  0
    3.5670   -0.6633   -0.0522 O   0  0  0  0  0  0  0  0  0  0  0  0
    4.7675    0.0194    0.3109 C   0  0  0  0  0  0  0  0  0  0  0  0
    4.8299    1.3385   -0.4696 C   0  0  0  0  0  0  0  0  0  0  0  0
    3.6684    2.2236   -0.0108 C   0  0  0  0  0  0  0  0  0  0  0  0
   -1.3030    2.1171    0.0197 C   0  0  0  0  0  0  0  0  0  0  0  0
   -2.4629    1.4307    0.0215 N   0  0  0  0  0  0  0  0  0  0  0  0
   -1.3161    3.3329    0.0264 O   0  0  0  0  0  0  0  0  0  0  0  0
    4.7120    1.0760   -1.8693 O   0  0  0  0  0  0  0  0  0  0  0  0
    5.9790   -0.8458   -0.0421 C   0  0  0  0  0  0  0  0  0  0  0  0
    4.7610    0.3095    1.8131 C   0  0  0  0  0  0  0  0  0  0  0  0
    5.8986   -2.1707    0.7189 C   0  0  0  0  0  0  0  0  0  0  0  0
    7.0919   -3.0229    0.3713 C   0  0  0  0  0  0  0  0  0  0  0  0
    7.8663   -3.4846    1.3217 C   0  0  0  0  0  0  0  0  0  0  0  0
    7.5638   -3.1635    2.7627 C   0  0  0  0  0  0  0  0  0  0  0  0
    9.0595   -4.3368    0.9740 C   0  0  0  0  0  0  0  0  0  0  0  0
   -3.7394    2.1495    0.0314 C   0  0  0  0  0  0  0  0  0  0  0  0
   -4.1289    2.5171   -1.4018 C   0  0  0  0  0  0  0  0  0  0  0  0
   -4.3725    1.3243   -2.1500 O   0  0  0  0  0  0  0  0  0  0  0  0
   -2.9905    3.3045   -2.0537 C   0  0  0  0  0  0  0  0  0  0  0  0
   -4.8061    1.2707    0.6322 C   0  0  0  0  0  0  0  0  0  0  0  0
   -4.5285    0.1581    1.0129 O   0  0  0  0  0  0  0  0  0  0  0  0
   -6.0645    1.7239    0.7443 O   0  0  0  0  0  0  0  0  0  0  0  0
   -7.0397    0.8231    1.3324 C   0  0  0  0  0  0  0  0  0  0  0  0
  1  2  2  0      
  2  3  1  0      
  3  4  2  0      
  4  5  1  0      
  5  6  2  0      
  6  1  1  0      
  4  7  1  0      
  7  8  1  0      
  8  9  1  0      
  9 10  1  0      
 10  5  1  0      
  1 11  1  0      
 11 12  1  0      
 11 13  2  0      
  9 14  1  0      
  8 15  1  0      
  8 16  1  0      
 15 17  1  0      
 17 18  1  0      
 18 19  2  0      
 19 20  1  0      
 19 21  1  0      
 22 12  1  0      
 22 23  1  0      
 23 24  1  0      
 23 25  1  0      
 22 26  1  0      
 26 27  2  0      
 26 28  1  0      
 28 29  1  0      
M  STY  1   1 SUP
M  SLB  1   1   1
M  SAL   1  4  26  27  28  29
M  SBL   1  1  27
M  SMT   1 COOCH3
M  SBV   1 27   -8.0141    7.4147
M  END
$$$$
