# Supplementary material for: Identification of Two Novel Anti-Fibrotic Benzopyran Compounds Produced by Engineered Strains Derived from Streptomyces xiamenensis M1-94P that Originated from Deep-Sea Sediments
Source: MDPI journal article supplement (doi:10.3390/md11104035), 2013-10-22
Supplement: s5 [file s5]

marinedrugs-11-04035-s002.mol
  ChemDraw11081308372D

 29 30  0  0  0  0  0  0  0  0999 V2000
   -1.8473   -0.3816    0.0000 C   0  0  0  0  0  0  0  0  0  0  0  0
   -1.8473   -1.2066    0.0000 C   0  0  0  0  0  0  0  0  0  0  0  0
   -1.1328   -1.6191    0.0000 C   0  0  0  0  0  0  0  0  0  0  0  0
   -0.4183   -1.2066    0.0000 C   0  0  0  0  0  0  0  0  0  0  0  0
   -0.4183   -0.3816    0.0000 C   0  0  0  0  0  0  0  0  0  0  0  0
   -1.1328    0.0309    0.0000 C   0  0  0  0  0  0  0  0  0  0  0  0
    0.2962   -1.6191    0.0000 O   0  0  0  0  0  0  0  0  0  0  0  0
    1.0106   -1.2066    0.0000 C   0  0  0  0  0  0  0  0  0  0  0  0
    1.0106   -0.3816    0.0000 C   0  0  0  0  0  0  0  0  0  0  0  0
    0.2962    0.0309    0.0000 C   0  0  0  0  0  0  0  0  0  0  0  0
   -2.5617    0.0309    0.0000 C   0  0  0  0  0  0  0  0  0  0  0  0
   -2.5617    0.8559    0.0000 N   0  0  0  0  0  0  0  0  0  0  0  0
   -3.2762   -0.3816    0.0000 O   0  0  0  0  0  0  0  0  0  0  0  0
    1.7251    0.0309    0.0000 O   0  0  0  0  0  0  0  0  0  0  0  0
    1.7251   -1.6191    0.0000 C   0  0  0  0  0  0  0  0  0  0  0  0
    1.0106   -2.0316    0.0000 C   0  0  0  0  0  0  0  0  0  0  0  0
    2.4396   -1.2066    0.0000 C   0  0  0  0  0  0  0  0  0  0  0  0
    3.1540   -1.6191    0.0000 C   0  0  0  0  0  0  0  0  0  0  0  0
    3.8685   -1.2066    0.0000 C   0  0  0  0  0  0  0  0  0  0  0  0
    3.8685   -0.3816    0.0000 C   0  0  0  0  0  0  0  0  0  0  0  0
    4.5830   -1.6191    0.0000 C   0  0  0  0  0  0  0  0  0  0  0  0
   -3.1540    1.6191    0.0000 C   0  0  0  0  0  0  0  0  0  0  0  0
   -3.8685    1.2066    0.0000 C   0  0  0  0  0  0  0  0  0  0  0  0
   -4.4519    1.7899    0.0000 O   0  0  0  0  0  0  0  0  0  0  0  0
   -4.2810    0.4921    0.0000 C   0  0  0  0  0  0  0  0  0  0  0  0
   -3.8685    2.0316    0.0000 C   0  0  0  0  0  0  0  0  0  0  0  0
   -4.5830    1.6191    0.0000 O   0  0  0  0  0  0  0  0  0  0  0  0
   -3.1540    1.6191    0.0000 O   0  0  0  0  0  0  0  0  0  0  0  0
   -2.4396    2.0316    0.0000 C   0  0  0  0  0  0  0  0  0  0  0  0
  1  2  2  0      
  2  3  1  0      
  3  4  2  0      
  4  5  1  0      
  5  6  2  0      
  6  1  1  0      
  4  7  1  0      
  7  8  1  0      
  8  9  1  0      
  9 10  1  0      
 10  5  1  0      
  1 11  1  0      
 11 12  1  0      
 11 13  2  0      
  9 14  1  6      
  8 15  1  6      
  8 16  1  1      
 15 17  1  0      
 17 18  1  0      
 18 19  2  0      
 19 20  1  0      
 19 21  1  0      
 22 12  1  1      
 22 23  1  0      
 23 24  1  1      
 23 25  1  0      
 22 26  1  0      
 26 27  2  0      
 26 28  1  0      
 28 29  1  0      
M  STY  1   1 SUP
M  SLB  1   1   1
M  SAL   1  4  26  27  28  29
M  SBL   1  1  27
M  SMT   1 COOCH3
M  SBV   1 27   -8.0141    7.4147
M  END
